# Supplementary material
Source: publisher figshare collection journal article supplement (https://wiley.figshare.com/articles/dataset/_/3562833)
Supplement: Supplementary file 1 [file 1]

## Appendix B - Proof of Eqs. A1.

Let  $\chi_\sigma$  and  $\chi_C$  be the characteristic polynomials of matrix  $\mathbf{M}_\sigma$  and  $\mathbf{C}$  respectively. Because

$\mathbf{M}_\sigma = e\mathbf{C} + \sigma\mathbf{P}'\mathbf{C}$ , the explicit computation of  $\det(\mathbf{M}_\sigma - X\mathbf{I})$  gives

$\chi_\sigma(X) = e^n(\chi_C(X/e) - \sigma Q_\sigma(X))$ , where  $Q_\sigma$  is a polynomial of degree  $n-1$  which coefficients

depend on  $\sigma$ . As  $\lambda_{M_\sigma}$  is an eigenvalue of  $\mathbf{M}_\sigma$ , it verifies  $\chi_\sigma(\lambda_{M_\sigma}) = 0$ , i.e.,

$$\chi_C(\lambda_{M_\sigma}/e) = \sigma Q_\sigma(\lambda_{M_\sigma}).$$

Assuming  $\mathbf{C}$  is primitive and irreducible, the dominant eigenvalue  $\lambda_C$  of  $\mathbf{C}$  is a single root of

$\chi_C$ . There exists an open neighbourhood  $V$  of  $\lambda_C$  such that  $\chi_C$  is continuously differentiable

with nonzero derivative on  $V$ . Following the inverse function theorem,  $\chi_C$  restricted to  $V$  is

invertible, and its invert function, denoted  $\chi_C^{-1}$ , is continuously differentiable. We then have

$$\lambda_{M_\sigma} = e\chi_C^{-1}(\sigma Q_\sigma(\lambda_{M_\sigma})).$$

$Q_\sigma(\lambda_{M_\sigma})$  is bounded for  $\sigma \in V$ , so a Taylor-Young expansion gives:

$$\begin{aligned} \lambda_{M_\sigma} &= e\chi_C^{-1}(0) + e \frac{1}{\chi_C' \circ \chi_C^{-1}(0)} \sigma Q_\sigma(\lambda_{M_\sigma}) + O(\sigma^2) \\ &= e\lambda_C + e \frac{1}{\chi_C'(\lambda_C)} \sigma Q_\sigma(\lambda_{M_\sigma}) + O(\sigma^2) \end{aligned}$$

As  $\lambda_C$  is a single root of  $\chi_C$ ,  $\chi_C'(\lambda_C) \neq 0$ , and we conclude that  $\lambda_{M_\sigma} = e\lambda_C + O(\sigma)$ .

Let us denote  $\mathbf{A}_\sigma = \mathbf{M}_\sigma - \lambda_{M_\sigma} \mathbf{I}$ , and  $\tilde{\mathbf{A}}_\sigma$  its adjugate matrix.  $\mathbf{N}_{M_\sigma}$  is a positive vector with norm 1 which verifies  $\mathbf{A}_\sigma \mathbf{N}_{M_\sigma} = \mathbf{0}$ . When  $\sigma$  is small enough, the order of multiplicity of  $\lambda_{M_\sigma}$  is 1 and the rank of  $\mathbf{A}_\sigma$  is  $n-1$ . Then  $\tilde{\mathbf{A}}_\sigma$  has rank 1 and verifies  $\mathbf{A}_\sigma \tilde{\mathbf{A}}_\sigma = \mathbf{0}$ , which implies that  $\mathbf{N}_{M_\sigma}$  is the unique nonnegative vector of norm 1 which is the generator of the columns of  $\tilde{\mathbf{A}}_\sigma$ . Elements of  $\tilde{\mathbf{A}}_\sigma$  are polynomials of the elements of  $\mathbf{A}_\sigma$ . We deduce that  $\mathbf{N}_{M_\sigma}$  tends continuously toward the positive vector  $\mathbf{N}_C$  and verifies  $\mathbf{N}_{M_\sigma} = \mathbf{N}_C + O(\sigma)$ .
